# Supplementary material for: SPE cartridges with a 3D graphene framework for extraction of triclosan in environmental water
Source: Royal Society of Chemistry journal article supplement (doi:10.1039/c9ay01918a), 2019-12-13
Supplement: c9ay01918a1.pdf [file c9ay01918a1.pdf]

## Electronic supplementary information

### SPE cartridges with 3D graphene framework for extraction of triclosan in environmental water

Anderson Thesing<sup>1,2</sup>, Sílvia Poersch<sup>1</sup>, Leonardo F. Medeiros<sup>1</sup>, Jacqueline F. Leite Santos<sup>1,\*</sup>, Andreia N. Fernandes<sup>1,\*</sup>

<sup>1</sup>Instituto de Química, Universidade Federal do Rio Grande do Sul, Av. Bento Gonçalves, nº 9500, 91501-970, Porto Alegre, Brazil.

<sup>2</sup>Programa de Pós-graduação em Ciência e Engenharia de Materiais, Universidade Federal de Pelotas, Rua Gomes Carneiro nº 1, 96010-000, Pelotas, Rio Grande do Sul, Brazil.

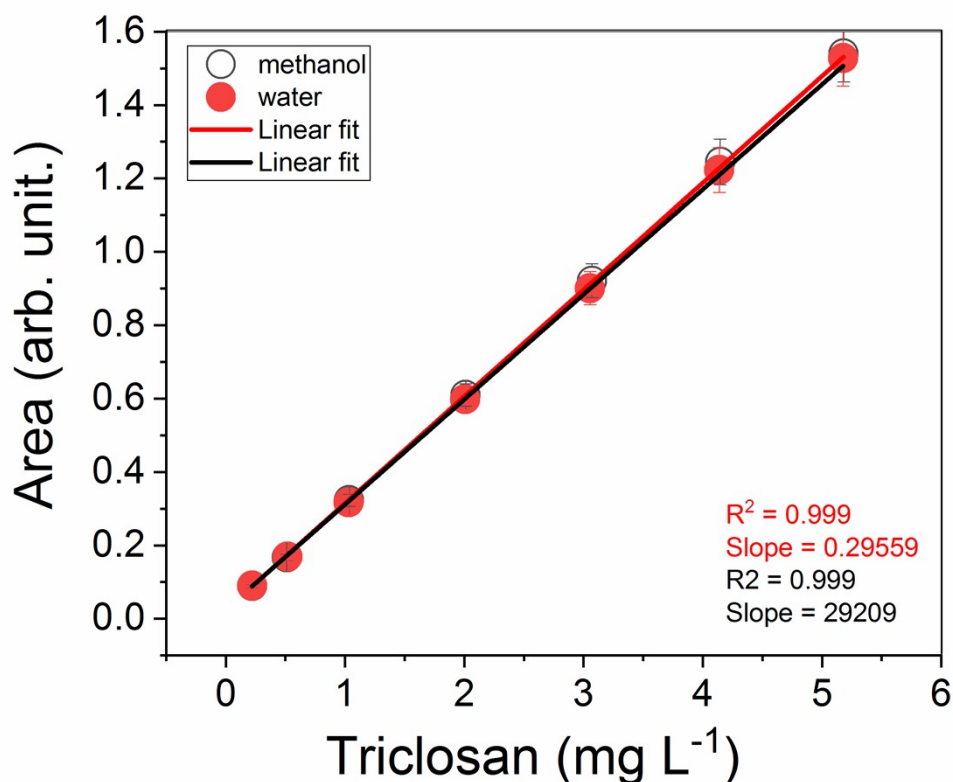

**Fig. S1.** Analytical curves of triclosan in methanol and surface water matrix (n = 5).

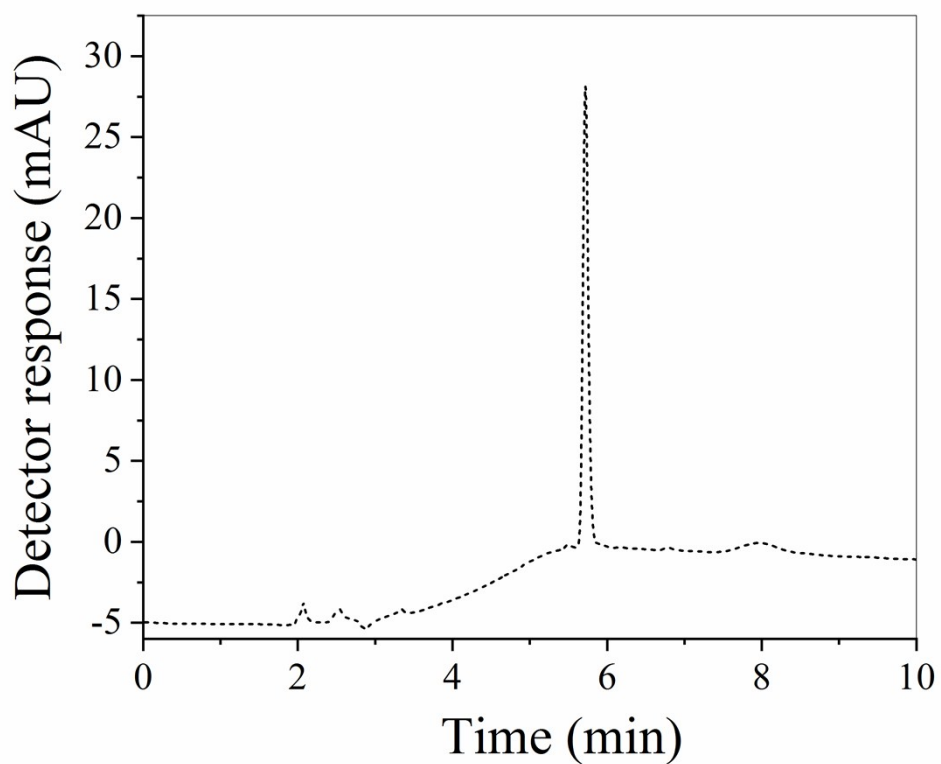

**Fig. S2.** Chromatogram of the surface water sample collected in Guaíba River spiked with 4.5 mg L<sup>-1</sup> of triclosan.
